# Supplementary material
Source: PubMed Central journal article supplement (PMC7276554)
Supplement: rsif20200098supp2.pdf [file rsif20200098supp2.pdf]

Supplemental Table 1: GSEA results using the Reactome database. The normalized enrichment score (NES) characterizes the up-/downregulation and the p-value is the adjusted p-value using the Benjamini-Hochberg criterion.

| ID            | Description                                                                       | NES    | p-value |
|---------------|-----------------------------------------------------------------------------------|--------|---------|
| R-HSA-1474244 | Extracellular matrix organization                                                 | -1.729 | 0.037   |
| R-HSA-3000178 | ECM proteoglycans                                                                 | -1.921 | 0.037   |
| R-HSA-111885  | Opioid Signalling                                                                 | -1.867 | 0.037   |
| R-HSA-6809371 | Formation of the cornified envelope                                               | 2.144  | 0.037   |
| R-HSA-5368287 | Mitochondrial translation                                                         | 1.936  | 0.037   |
| R-HSA-5389840 | Mitochondrial translation elongation                                              | 1.948  | 0.037   |
| R-HSA-5368286 | Mitochondrial translation initiation                                              | 1.942  | 0.037   |
| R-HSA-6805567 | Keratinization                                                                    | 2.173  | 0.037   |
| R-HSA-381753  | Olfactory Signaling Pathway                                                       | -1.785 | 0.052   |
| R-HSA-5083625 | Defective GALNT3 causes familial hyperphosphatemic tumoral calcinosis (HFTC)      | 1.995  | 0.053   |
| R-HSA-5419276 | Mitochondrial translation termination                                             | 1.904  | 0.053   |
| R-HSA-3000171 | Non-integrin membrane-ECM interactions                                            | -1.867 | 0.056   |
| R-HSA-8866910 | TFAP2 (AP-2) family regulates transcription of growth factors and their receptors | -1.872 | 0.056   |
| R-HSA-72312   | rRNA processing                                                                   | 1.808  | 0.066   |
| R-HSA-375276  | Peptide ligand-binding receptors                                                  | 1.757  | 0.076   |
| R-HSA-6791226 | Major pathway of rRNA processing in the nucleolus and cytosol                     | 1.745  | 0.076   |
| R-HSA-5083636 | Defective GALNT12 causes colorectal cancer 1 (CRCS1)                              | 1.966  | 0.079   |
| R-HSA-8948216 | Collagen chain trimerization                                                      | -1.820 | 0.079   |
| R-HSA-8868773 | rRNA processing in the nucleus and cytosol                                        | 1.785  | 0.079   |
| R-HSA-72766   | Translation                                                                       | 1.655  | 0.079   |
| R-HSA-445355  | Smooth Muscle Contraction                                                         | -1.832 | 0.079   |
| R-HSA-72203   | Processing of Capped Intron-Containing Pre-mRNA                                   | 1.680  | 0.085   |
| R-HSA-112314  | Neurotransmitter receptors and postsynaptic signal transmission                   | -1.634 | 0.086   |
| R-HSA-1650814 | Collagen biosynthesis and modifying enzymes                                       | -1.725 | 0.086   |
| R-HSA-72172   | mRNA Splicing                                                                     | 1.749  | 0.086   |
| R-HSA-73854   | RNA Polymerase I Promoter Clearance                                               | 1.873  | 0.090   |
| R-HSA-1442490 | Collagen degradation                                                              | -1.745 | 0.096   |
