# Supplementary material
Source: PubMed Central journal article supplement (PMC7276554)

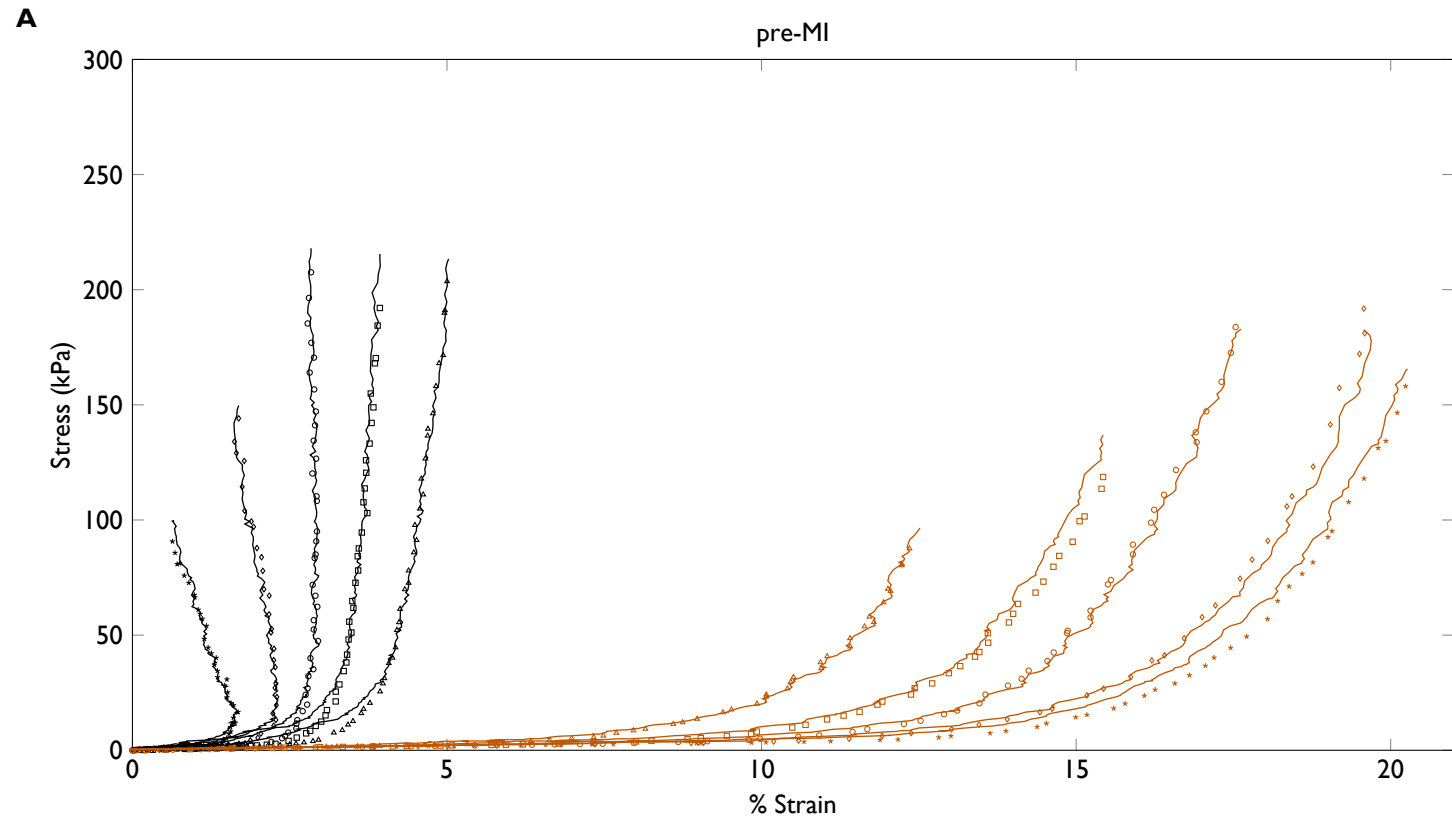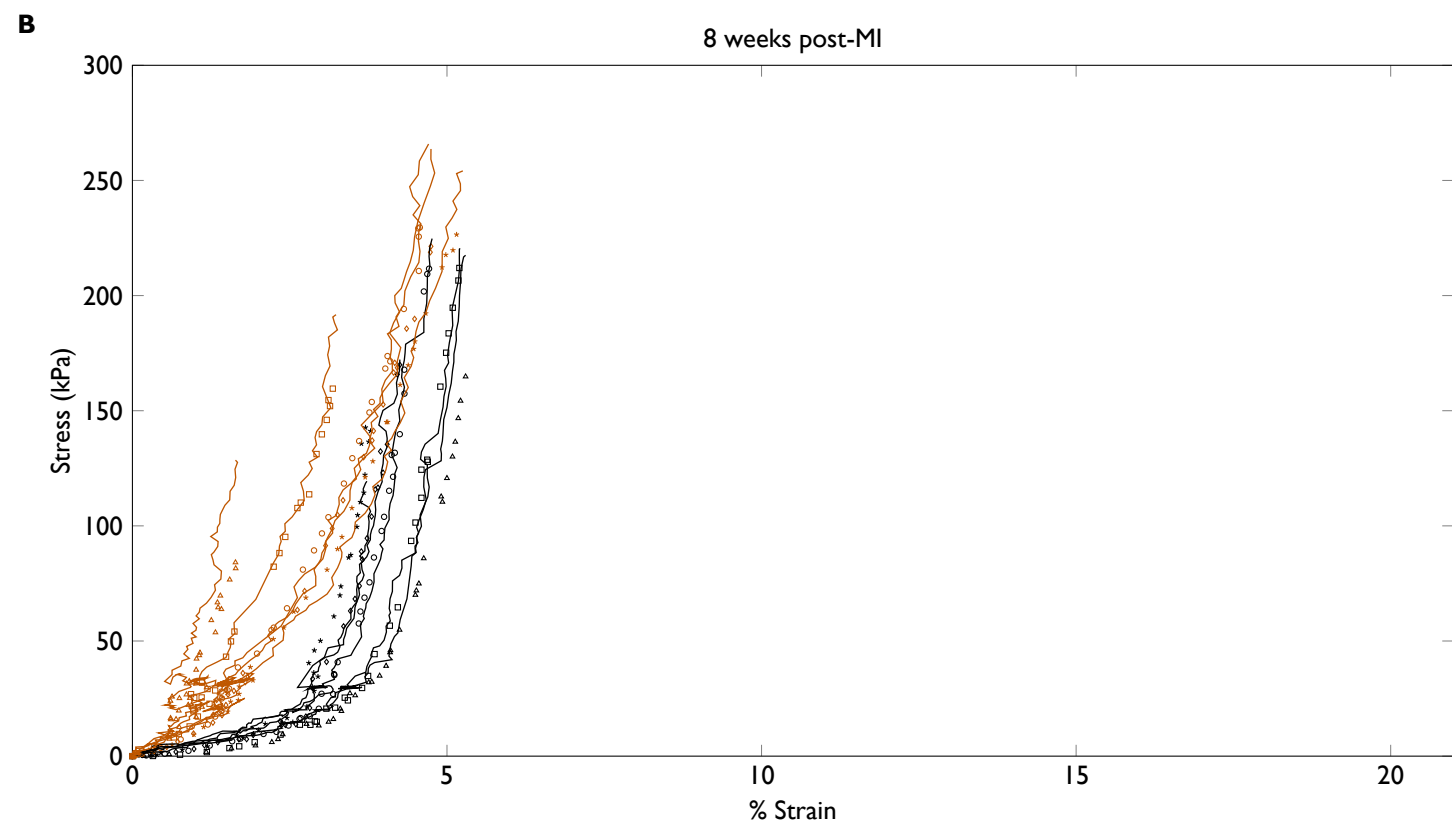

■ Circumferential    ■ Radial    ▲ 0.5:1 Data    □ 0.75:1 Data    ○ 1:1 Data    ◇ 1:0.75 Data    \* 1:0.5 Data    — Model

Supplement: rsif20200098supp1.pdf [file rsif20200098supp1.pdf]
